# Supplementary material for: Novel Antimicrobial Indolepyrazines A and B from the Marine-Associated Acinetobacter sp. ZZ1275
Source: PubMed Central journal article supplement (PMC6410138; doi:10.3390/md17020089), 2019-02-01

## ***Supplementary Materials for***

### **Novel Antimicrobial Indolepyrazines A and B from the Marine-Associated *Acinetobacter* sp. ZZ1275**

Komal Anjum <sup>1</sup>, Sidra Kaleem <sup>2</sup>, Wenwen Yi <sup>2</sup>, Guowan Zheng <sup>1</sup>, Xiaoyuan Lian <sup>1,\*</sup>  
and Zhizhen Zhang <sup>2,\*</sup>

<sup>1</sup> College of Pharmaceutical Sciences, Zhejiang University, Hangzhou 310058,  
China; komalazam@ymail.com (K.A.), 0818331@163.com (G.Z.)

<sup>2</sup> Ocean College, Zhoushan Campus, Zhejiang University, Zhoushan 316021,  
China; kaleemsidra85@yahoo.com (S.K.), 18790658213@163.com (W.Y.)

\* Correspondence: xylian@zju.edu.cn (X.L.); zzhang88@zju.edu.cn (Z.Z.);  
Tel.: +86-135-7547-6388 (X.L.); +86-136-7585-9706 (Z.Z.)

## CONTENT

|                                                                                                                                                                                     |    |
|-------------------------------------------------------------------------------------------------------------------------------------------------------------------------------------|----|
| Figure S <sub>1</sub> . 16S rDNA sequence of strain ZZ1275.....                                                                                                                     | 3  |
| Figure S <sub>2</sub> . Colony picture of strain ZZ1275.....                                                                                                                        | 3  |
| Table S <sub>1</sub> . Sequences producing significant alignments of strain ZZ1275.....                                                                                             | 4  |
| Figures S <sub>3-5</sub> . <sup>1</sup> H NMR spectra of indolepyrazine A ( <b>1</b> ).....                                                                                         | 4  |
| Figures S <sub>6-9</sub> . <sup>13</sup> C NMR spectra of indolepyrazine A ( <b>1</b> ).....                                                                                        | 6  |
| Figure S <sub>10</sub> . <sup>1</sup> H- <sup>1</sup> H COSY spectrum of indolepyrazine A ( <b>1</b> ).....                                                                         | 8  |
| Figures S <sub>11-12</sub> . HSQC spectra of indolepyrazine A ( <b>1</b> ).....                                                                                                     | 8  |
| Figures S <sub>13-15</sub> . HMBC spectra of indolepyrazine A ( <b>1</b> ).....                                                                                                     | 9  |
| Figure S <sub>16</sub> . HRESIMS spectrum of indolepyrazine A ( <b>1</b> ).....                                                                                                     | 11 |
| Figure S <sub>17</sub> . UV spectrum of indolepyrazine A ( <b>1</b> ).....                                                                                                          | 11 |
| Table S <sub>2</sub> . Gibbs free energies <sup>a</sup> and equilibrium populations <sup>b</sup> of low-energy conformers<br>( <b>1a-1d</b> ) of indolepyrazine A ( <b>1</b> )..... | 12 |
| Table S <sub>3</sub> . Cartesian coordinates for the low-energy reoptimized MMFF conformers of<br>indolepyrazine A ( <b>1</b> ) at B3LYP/6-311+G(d,p) level of theory in MeOH.....  | 12 |
| Figures S <sub>18-20</sub> . <sup>1</sup> H NMR spectra of indolepyrazine B ( <b>2</b> ).....                                                                                       | 17 |
| Figures S <sub>21-22</sub> . <sup>13</sup> C NMR spectra of indolepyrazine B ( <b>2</b> ).....                                                                                      | 18 |
| Figure S <sub>23</sub> . <sup>1</sup> H- <sup>1</sup> H COSY spectrum of indolepyrazine B ( <b>2</b> ).....                                                                         | 19 |
| Figures S <sub>24-25</sub> . HSQC spectra of indolepyrazine B ( <b>2</b> ).....                                                                                                     | 20 |
| Figures S <sub>26-27</sub> . HMBC spectra of indolepyrazine B ( <b>2</b> ).....                                                                                                     | 21 |
| Figure S <sub>28</sub> . HRESIMS spectrum of indolepyrazine B ( <b>2</b> ).....                                                                                                     | 22 |
| Figure S <sub>29</sub> . UV spectrum of indolepyrazine B ( <b>2</b> ).....                                                                                                          | 22 |

Figure S<sub>1</sub>. 16S rDNA sequence of strain ZZ1275

```
GCGTTGGTACCGCCCTCTTTGCAGTTATGCTACTACTTCTGGTGCAGCAAACCTCCC
ATGGTGAGACGGGCGGTGTGGACAAGGCCCGGGAACGTATTCTCCGCGGCATTCT
GATCCGCGATTACTAACGATTCCGACTTCATGGAGGCGAGTTGCAGACTCAAATCC
GGACTACGATCGACTTTTTTGATATTAACATCCTATCGCTAGGTAGCACCCCTTTGTA
CCGACCATTGTATGACGTGTGTAGCCCTGGCCGTAAGGGCCATGATGACTTGACGT
CGTCCCCGCCTTCTCCAGTTTGTCACTGCCCGGATCCTTAAAGTTCCCATCCGAA
ATGCTGGAAAGTAAGGAAAAGGGTTGCGCTCGTTGCGGGACTTAACCCAACATCT
CACGACCCGAGCTGACGACAGCCATGCGACACCTGTATGTAGATTCCCGAAGGCA
CCAATCCATCTCTGGAAATCTCTACTATGTCAAGGCCAAGGAAGGTTCTTCGCGTT
GCATCGAATTAACACATGCTCCACCGCTTGTGCGGGCCCCCGTCAATTCATTTG
AGTTTTASTCTTGMGAYCGTACTMGYCAGGCGRTCTASTTATCGYGTTAGMTGCGG
CACTAAAGCTTCAAAGGCCCAACGGGTAGTAGACATCGTTTACGGCATGGATTAC
CAGGGTATTTAATCCTGTTTGCTCCACATGCTTTAGTCCTCAGCGTCAGTGTTAGTT
CAGATGTCTGCCTTCGTCATGGGTATTAGTTCAGATCTCTACGCATTTCTTCGTTAC
ACCTGGAATTCTACCATCCTCTCCCACAGTATAGCCAATCAGTATTGAATGCAATTA
CCAAGTTAAGATCGGGGATTTACATTGGACTTAATTGGCCGCCTACGCGCGCTTT
ACGCACAGTAAATCCGATTTACGCTTGCACCATATGTATTGCCGCGGCTGGTGGCA
CAGAGTTAGCCGGTGCTTATTGTGCGAGTATAGTCCACTCATCTTAGGTATTAACTA
TGTGAGCCTCCTCTTCGCTTAAAGTGGTGTACAACCATAAGACGTTCTTCATACATG
CGGCATGGTTGGATCAGGGTTCTCTCCATTGTTCAATATTATTCACTGCTGCCTCCT
GTAGGAGTATGGTCCGTGTCTCAGTAGCAGTGTGGCGGATCATCGTCTCAGAAGCG
CTACAGATCGTCGCCTTGGTAGGCCTTTATTCCATCAACTAGATAATGAGAGTTAGG
GTCATCTATTAGCGCAAGGTCACAAGTGATCCCTTGCTTTCTCCCGTAGGACGTATG
CGGTATTAGCATCCCTTTGAGATGTTGTGCTCCAATAATAGGCAGATTCCCTAAGCA
TTACTCACTCGTCCGCCGGTAAGTGATAGTGCAAGCAACATGCATCTATCGCTCGA
CTTGCATGGTAGCCGCCAGCC (1429 bp).
```

Figure S<sub>2</sub>. Colony picture of strain ZZ1275

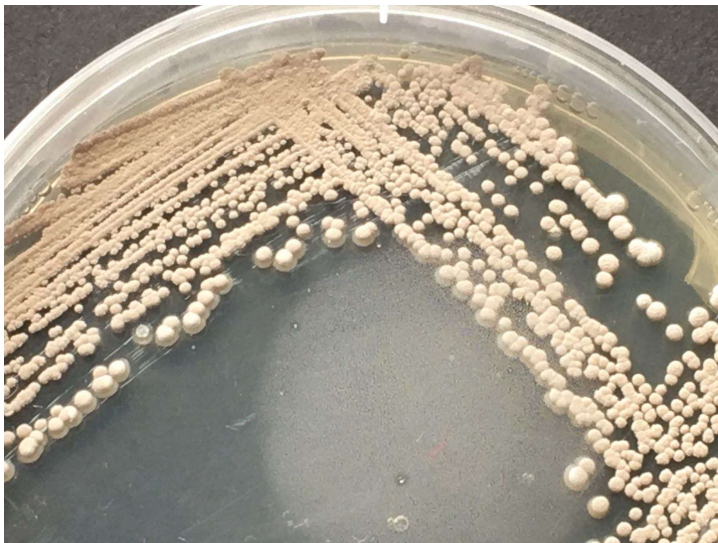

Table S1. Sequences producing significant alignments of strain ZZ1275.

| Accession  | Description                                                                            | Max score | Total score | Query coverage | Evalue | Ident |
|------------|----------------------------------------------------------------------------------------|-----------|-------------|----------------|--------|-------|
| MH746822.1 | <i>Acinetobacter baylyi</i> strain 16S ribosomal RNA gene, partial sequence            | 2606      | 2606        | 100%           | 0.0    | 100%  |
| KY817316.1 | <i>Acinetobacter baylyi</i> strain L7 16S ribosomal RNA gene, partial sequence         | 1969      | 1969        | 99%            | 0.0    | 92%   |
| KU863622.1 | Bacterium strain BPIC3 16S ribosomal RNA gene, partial sequence                        | 1967      | 1967        | 98%            | 0.0    | 92%   |
| MG011591.1 | <i>Acinetobacter baylyi</i> strain MnW3201007 16S ribosomal RNA gene, partial sequence | 1964      | 1964        | 98%            | 0.0    | 92%   |
| KU922292.1 | <i>Acinetobacter baumannii</i> strain L30 16S ribosomal RNA gene, partial sequence     | 1964      | 1964        | 98%            | 0.0    | 92%   |
| KU922258.1 | <i>Acinetobacter baumannii</i> strain L9 16S ribosomal RNA gene, partial sequence      | 1964      | 1964        | 98%            | 0.0    | 92%   |

Figure S3. <sup>1</sup>H NMR spectrum of indolepyrazine A (1)

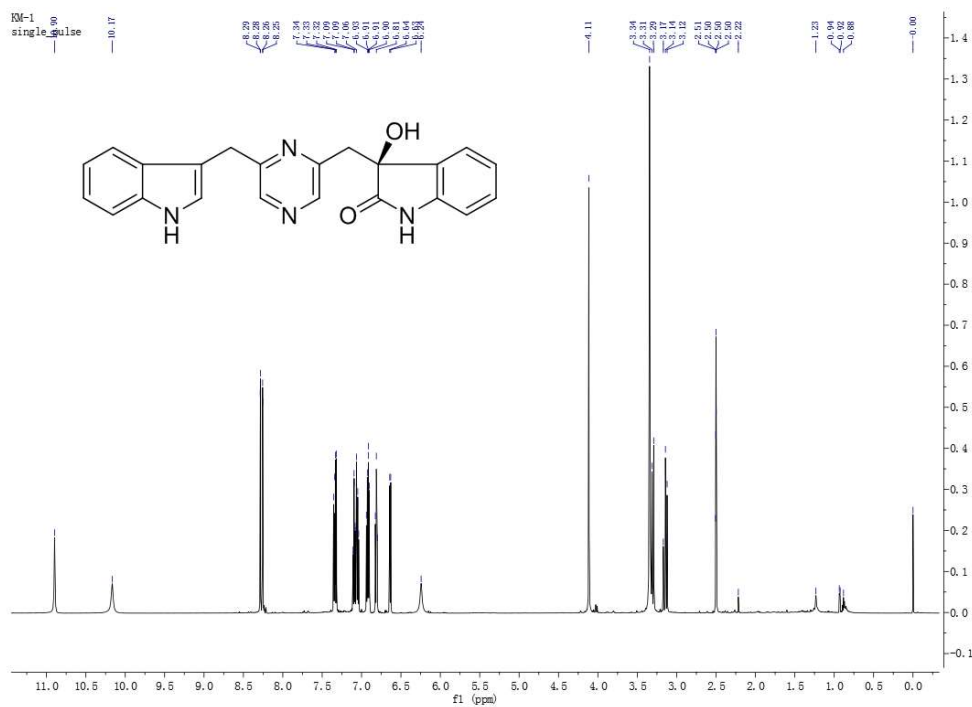

Figure S4.  $^1\text{H}$  NMR spectrum of indolepyrazine A (**1**)

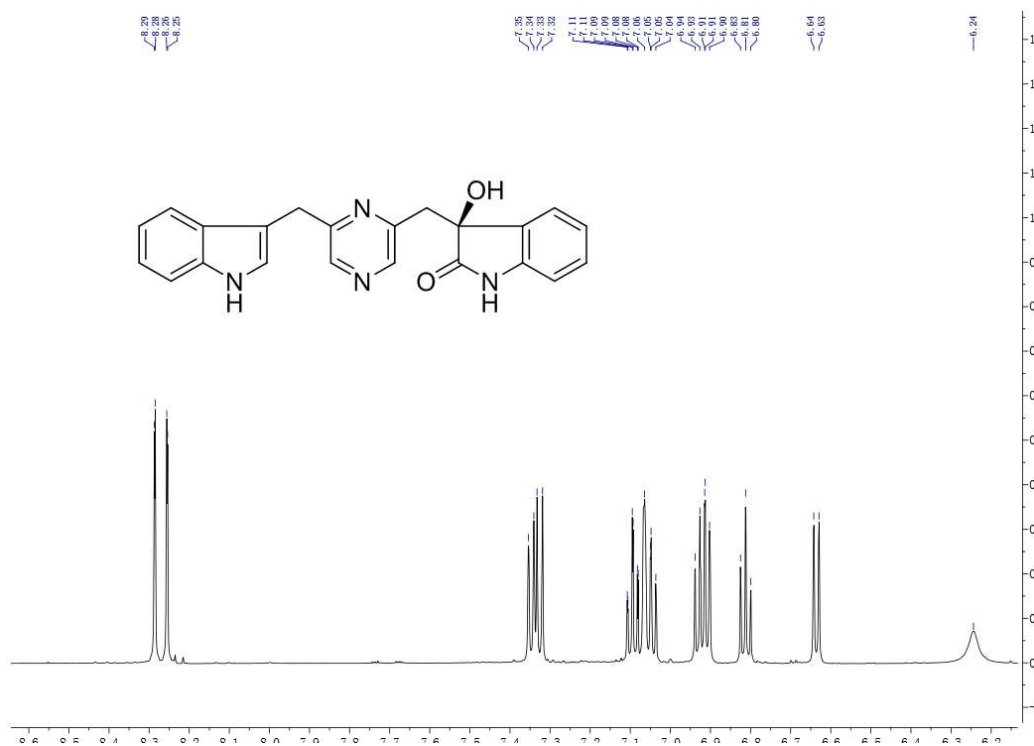

Figure S5.  $^1\text{H}$  NMR spectrum of indolepyrazine A (**1**)

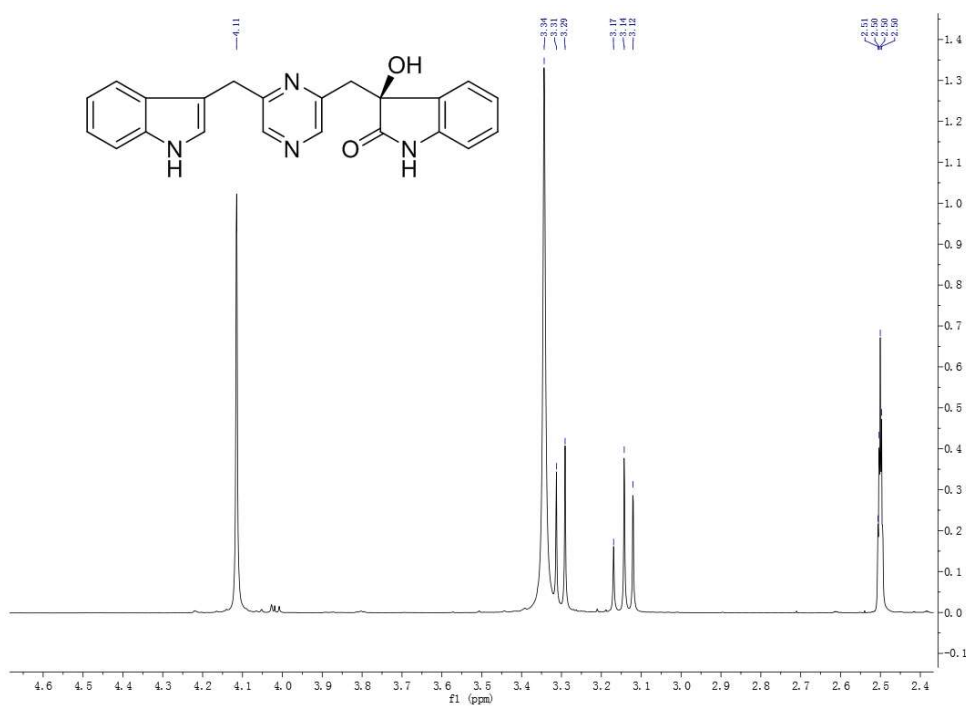

Figure S6.  $^{13}\text{C}$  NMR spectrum of indolepyrazine A (**1**)

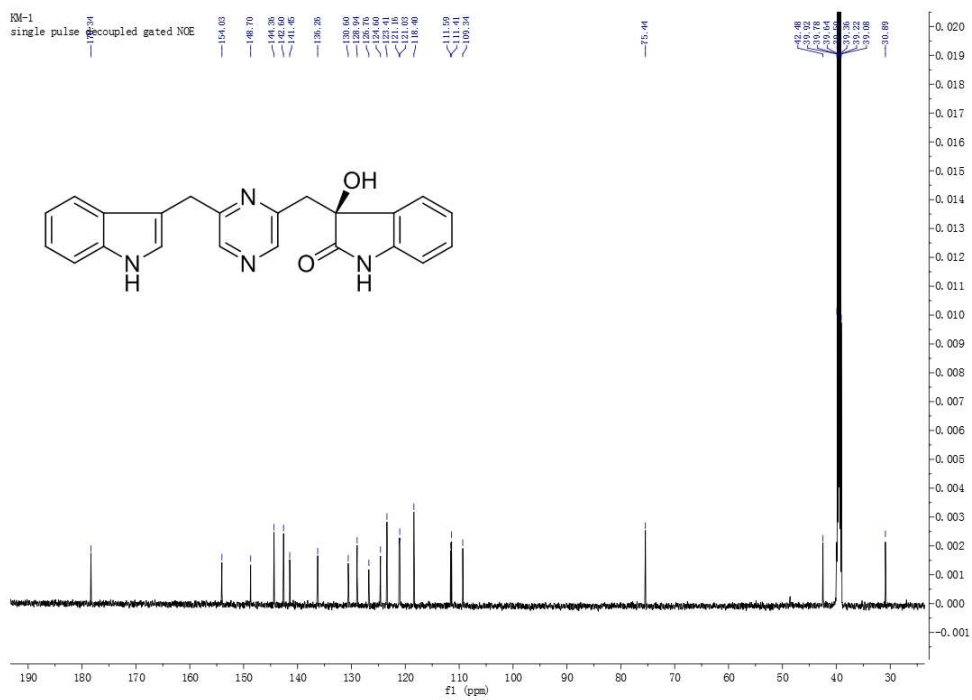

Figure S7.  $^{13}\text{C}$  NMR spectrum of indolepyrazine A (**1**)

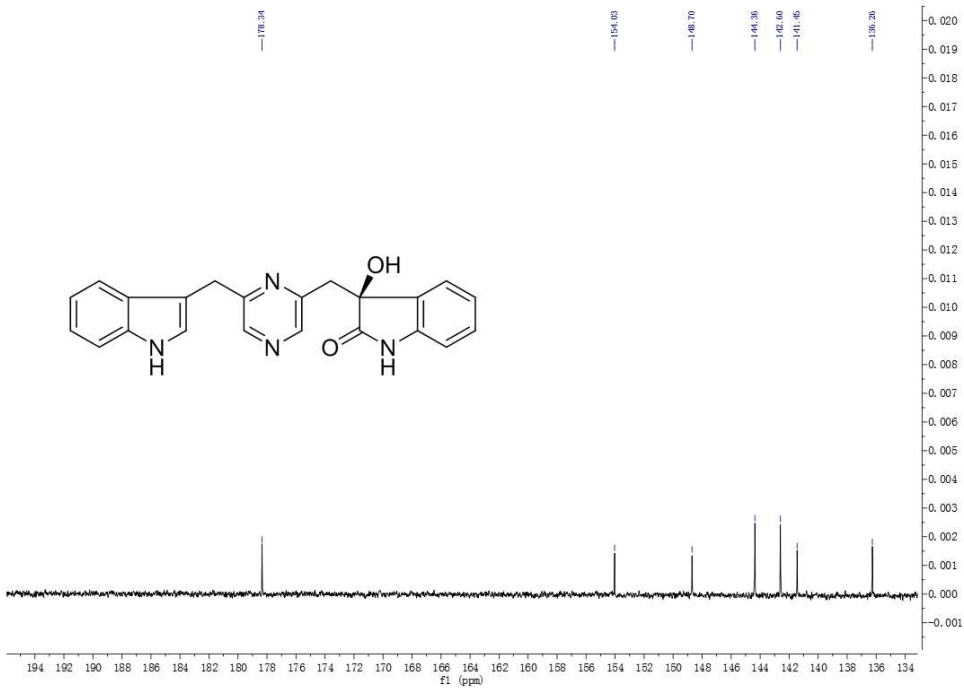

Figure S8.  $^{13}\text{C}$  NMR spectrum of indolepyrazine A (**1**)

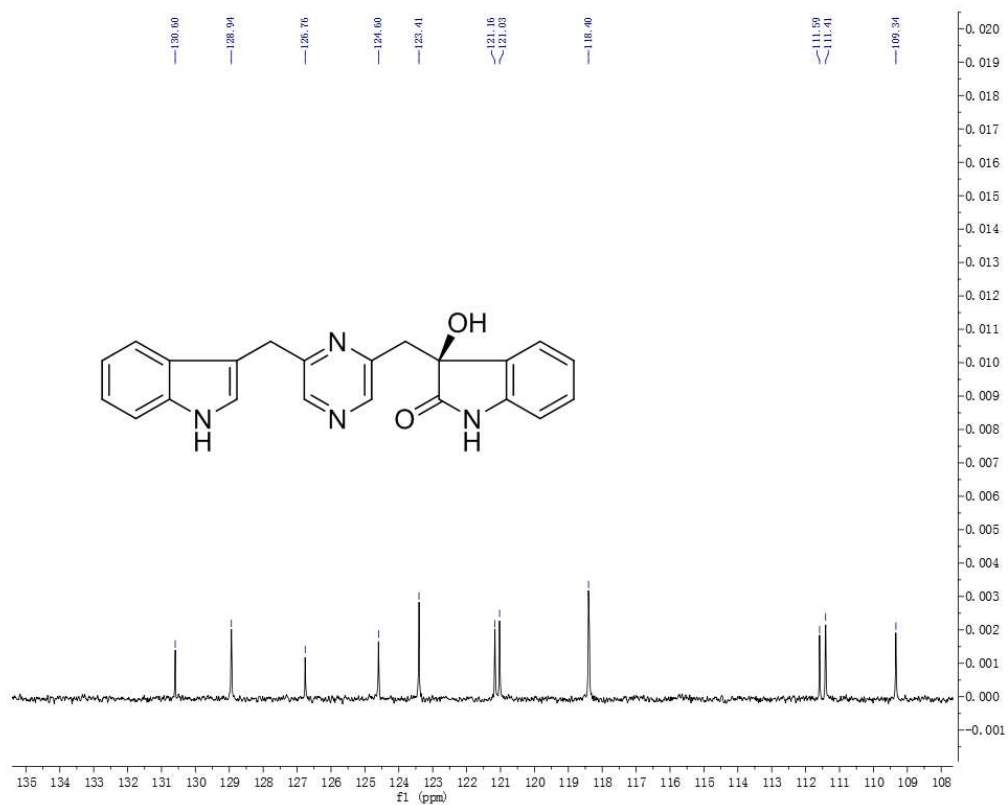

Figure S9.  $^{13}\text{C}$  NMR spectrum of indolepyrazine A (**1**)

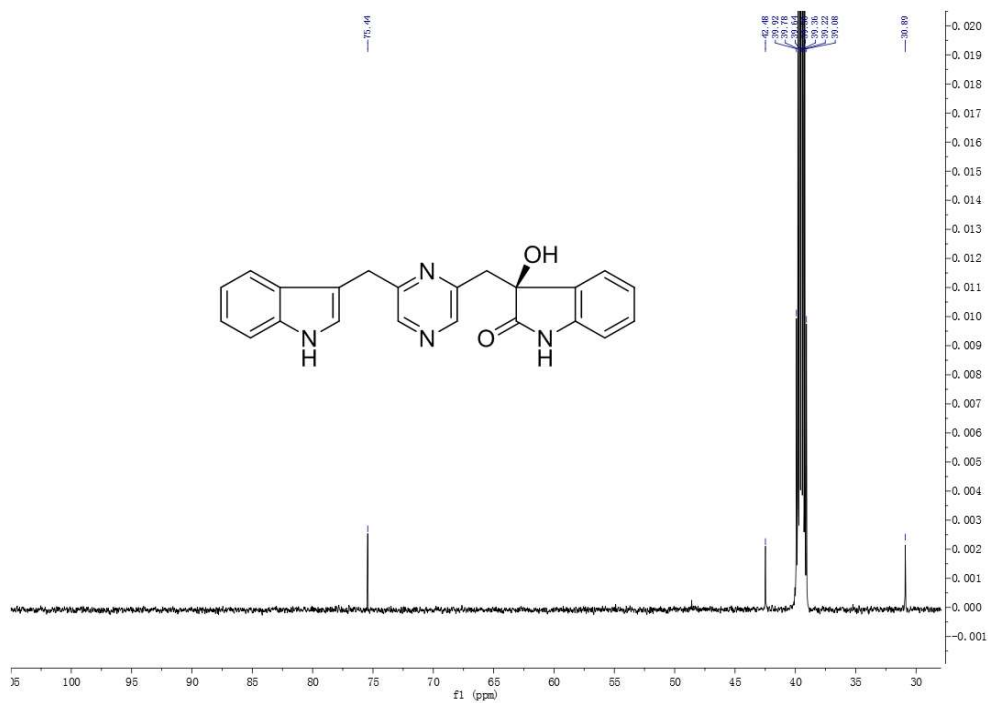

Figure S10.  $^1\text{H}$ - $^1\text{H}$  COSY spectrum of indolepyrazine A (**1**)

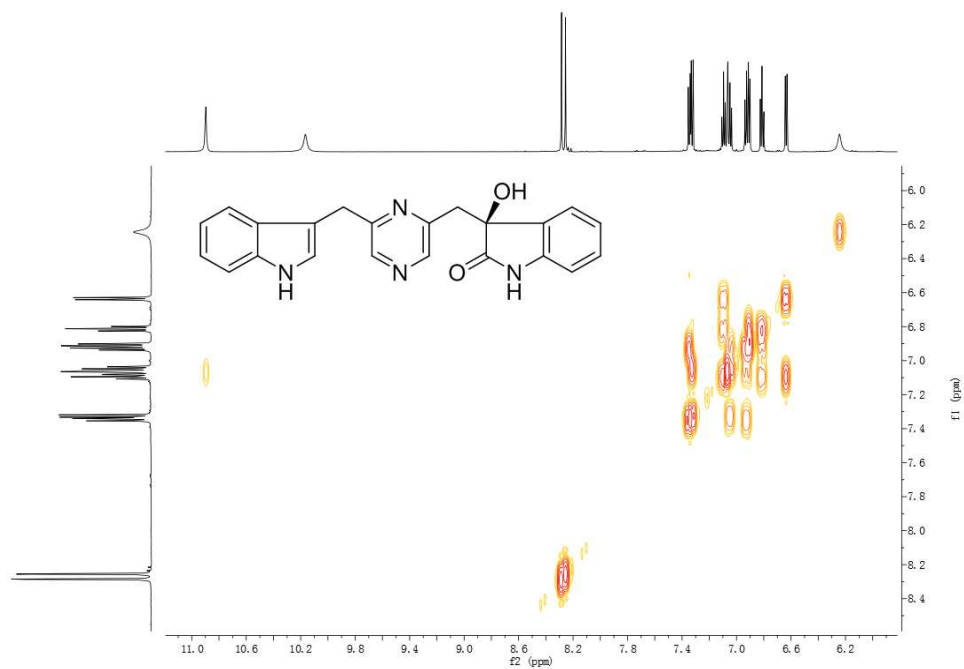

Figure S11. HSQC spectrum of indolepyrazine A (**1**)

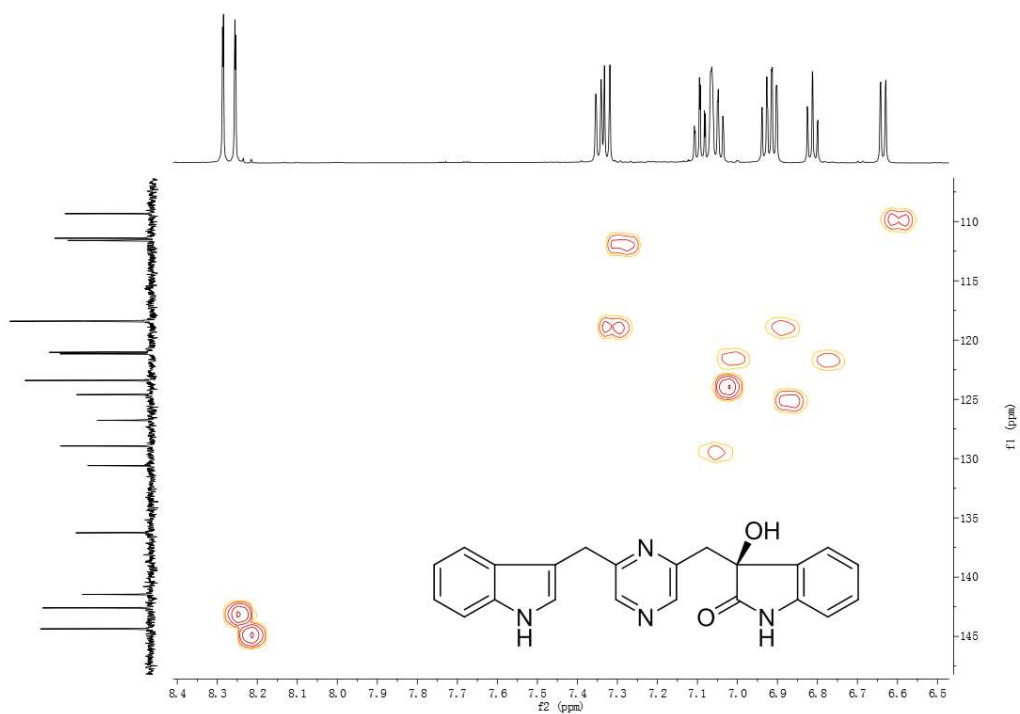



Figure S12. HSQC spectrum of indolepyrazine A (**1**)

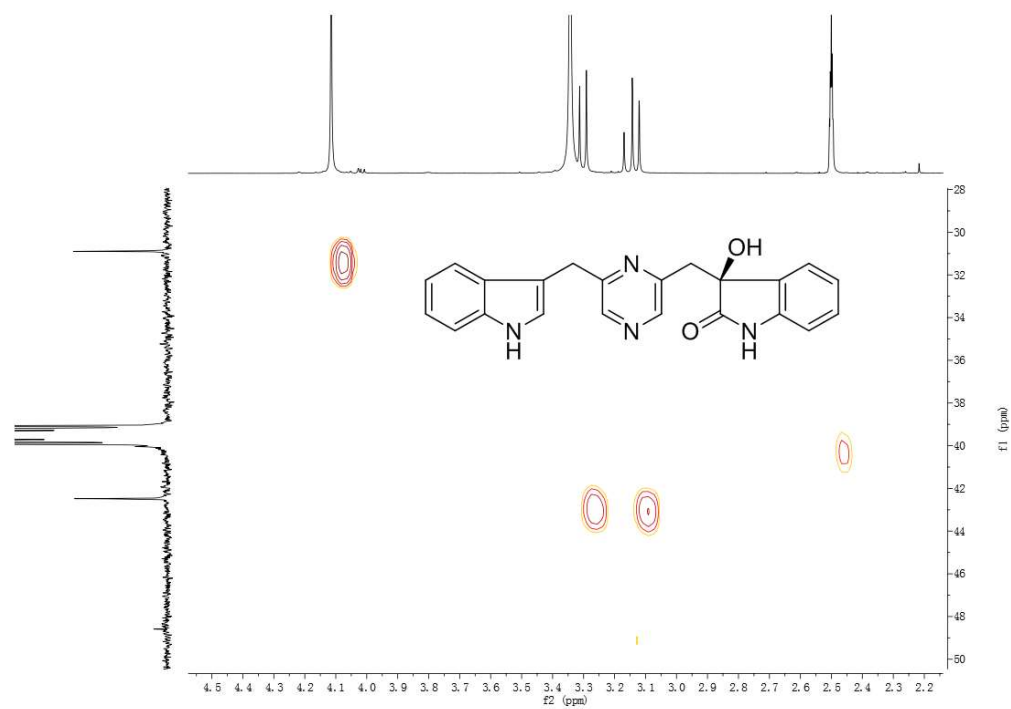

Figure S13. HMBC spectrum of indolepyrazine A (**1**)

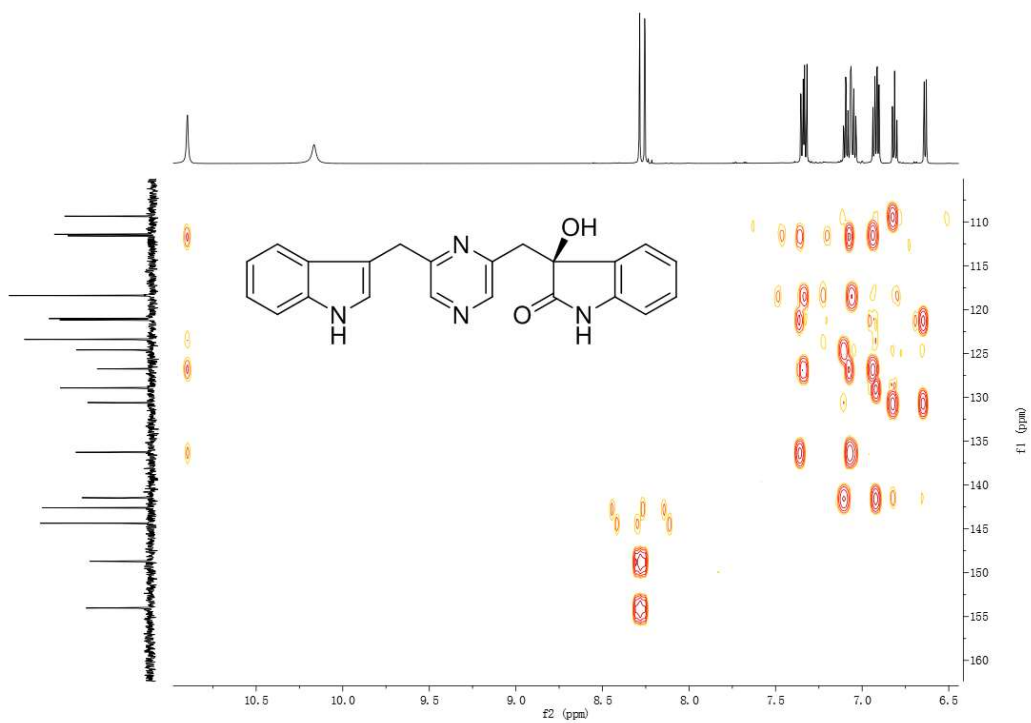

Figure S14. HMBC spectrum of indolepyrazine A (**1**)

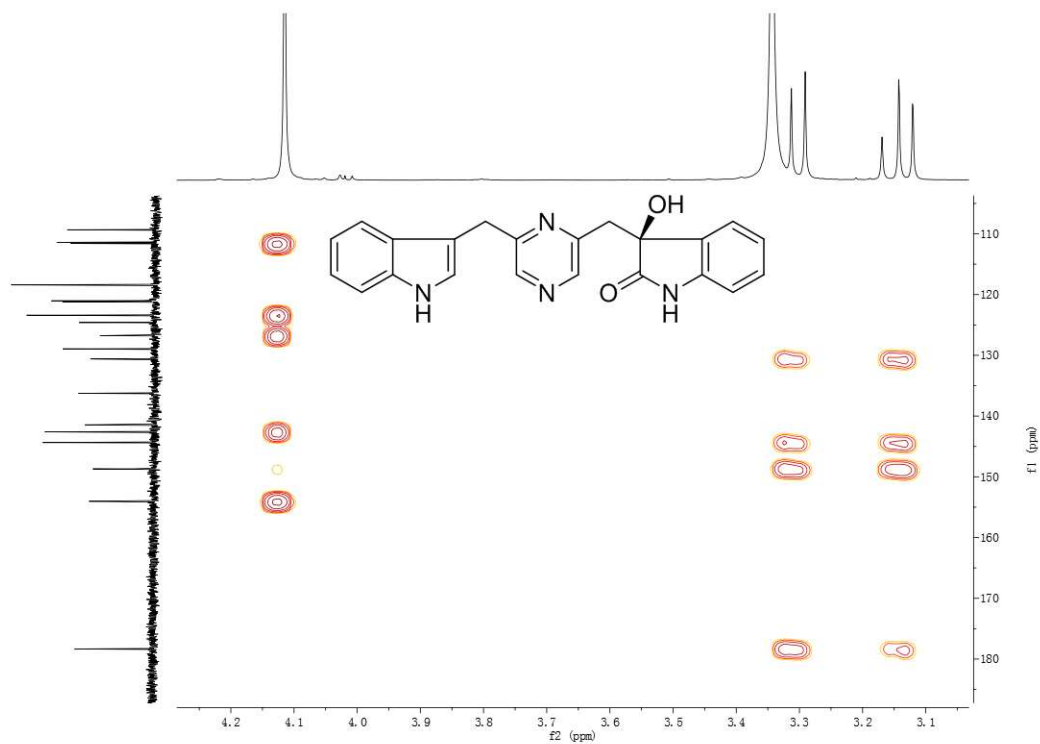

Figure S15. HMBC spectrum of indolepyrazine A (**1**)

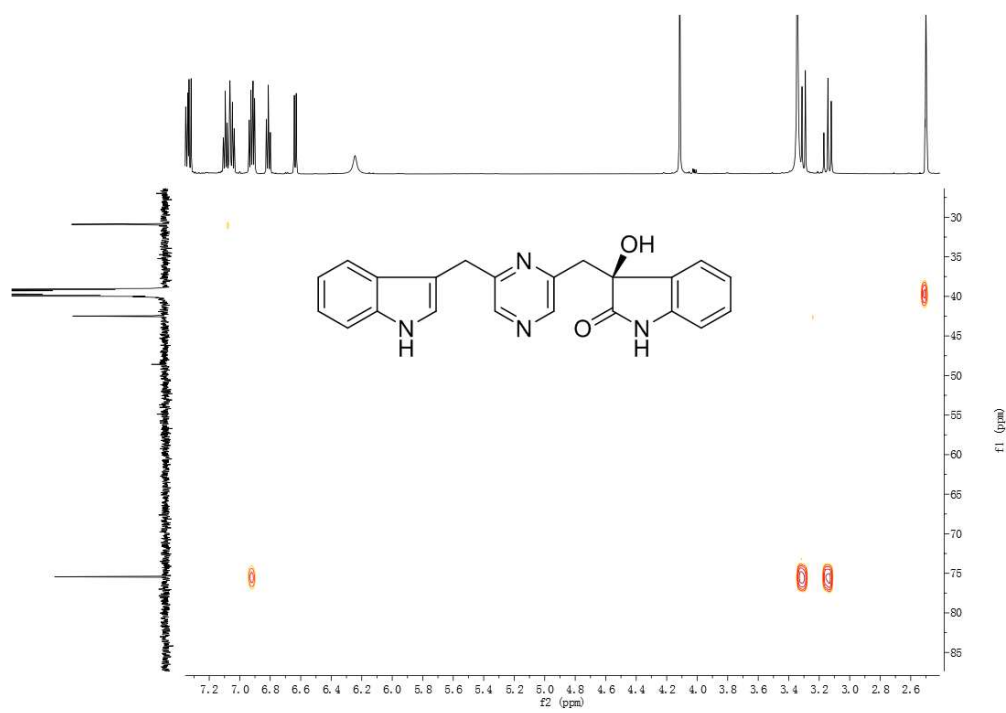

Figure S<sub>16</sub>. HRESIMS spectrum of indolepyrazine A (**1**)

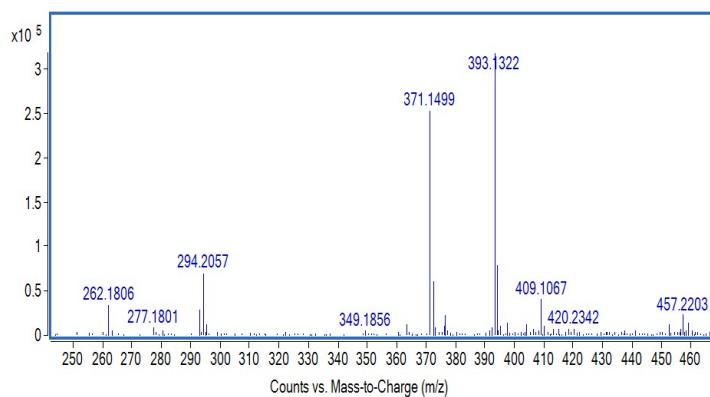

Figure S<sub>17</sub>. UV spectrum of indolepyrazine A (**1**)

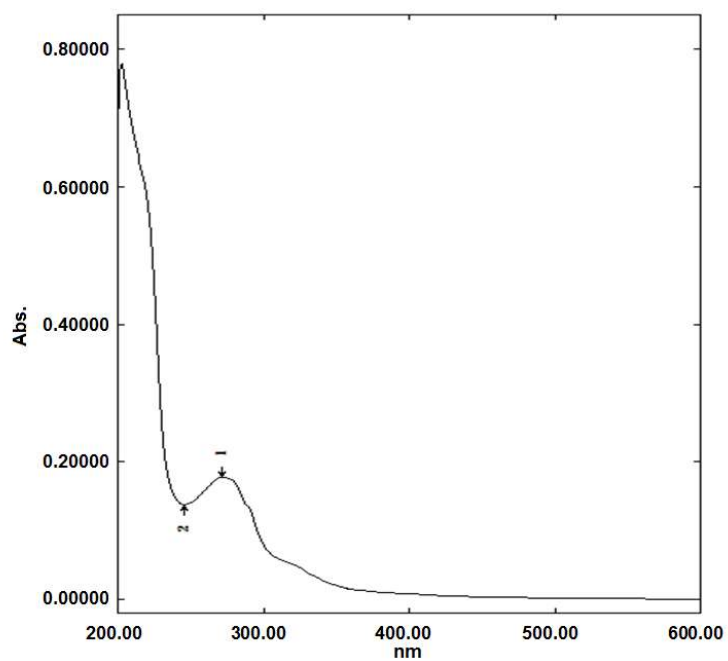

Table S2. Gibbs free energies and equilibrium populations of low-energy conformers (**1a–1d**) of indolepyrazine A (**1**).

| Conformers | In MeOH    |            |
|------------|------------|------------|
|            | $\Delta G$ | $\Delta G$ |
| <b>1a</b>  | 0          | 0          |
| <b>1b</b>  | 0.28       | 0.28       |
| <b>1c</b>  | 1.78       | 1.78       |
| <b>1d</b>  | 1.97       | 1.97       |

<sup>a</sup>B3LYP/6-31+G(d,p), in kcal/mol; <sup>b</sup> From  $\Delta G$  values at 298.15K.

Table S3. Cartesian coordinates for the low-energy reoptimized MMFF conformers of indolepyrazine A (**1**) at B3LYP/6-311+G(d,p) level of theory in MeOH.

| <b>1a</b> |      | Standard Orientation (Ångstroms) |           |           |           |
|-----------|------|----------------------------------|-----------|-----------|-----------|
| I         | Atom | Type                             | X         | Y         | Z         |
| 1.        | 6.   | 0.                               | 3.086124  | 1.549401  | 1.198165  |
| 2.        | 6.   | 0.                               | 3.195205  | 1.779314  | 2.587679  |
| 3.        | 6.   | 0.                               | 2.173161  | 2.400129  | 3.296731  |
| 4.        | 6.   | 0.                               | 1.031211  | 2.785001  | 2.582869  |
| 5.        | 6.   | 0.                               | 0.895102  | 2.557312  | 1.182855  |
| 6.        | 6.   | 0.                               | 1.949102  | 1.930971  | 0.491902  |
| 7.        | 7.   | 0.                               | -0.117688 | 3.414669  | 3.007932  |
| 8.        | 6.   | 0.                               | -0.962281 | 3.595062  | 1.931690  |
| 9.        | 6.   | 0.                               | -0.389586 | 3.084611  | 0.790684  |
| 10.       | 6.   | 0.                               | -2.872760 | 1.343262  | -0.507209 |
| 11.       | 6.   | 0.                               | -1.604149 | 1.727758  | -0.967354 |
| 12.       | 6.   | 0.                               | -1.001366 | 3.068986  | -0.587981 |
| 13.       | 7.   | 0.                               | -3.427826 | 0.172910  | -0.830867 |
| 14.       | 6.   | 0.                               | -2.702500 | -0.632961 | -1.616304 |
| 15.       | 6.   | 0.                               | -1.431691 | -0.276898 | -2.082017 |
| 16.       | 7.   | 0.                               | -0.892799 | 0.911848  | -1.756828 |
| 17.       | 6.   | 0.                               | 1.502739  | -1.158009 | -1.538831 |
| 18.       | 6.   | 0.                               | 0.441866  | -2.062579 | -2.227086 |
| 19.       | 6.   | 0.                               | -0.620703 | -1.197741 | -2.961462 |
| 20.       | 7.   | 0.                               | 1.411779  | -1.366620 | -0.190820 |
| 21.       | 6.   | 0.                               | 0.488449  | -2.381987 | 0.119741  |
| 22.       | 6.   | 0.                               | -0.101016 | -2.858817 | -1.062014 |
| 23.       | 8.   | 0.                               | 2.288595  | -0.430146 | -2.129540 |
| 24.       | 6.   | 0.                               | 0.164357  | -2.904245 | 1.365556  |
| 25.       | 6.   | 0.                               | -0.774117 | -3.944533 | 1.404653  |
| 26.       | 6.   | 0.                               | -1.361800 | -4.437899 | 0.237230  |
| 27.       | 6.   | 0.                               | -1.027407 | -3.889878 | -1.010273 |
| 28.       | 8.   | 0.                               | 1.093417  | -2.911345 | -3.165207 |

|                                            |      |      |           |           |           |
|--------------------------------------------|------|------|-----------|-----------|-----------|
| 29.                                        | 1.   | 0.   | 3.909041  | 1.074112  | 0.671332  |
| 30.                                        | 1.   | 0.   | 4.095194  | 1.469741  | 3.110584  |
| 31.                                        | 1.   | 0.   | 2.256637  | 2.581813  | 4.364068  |
| 32.                                        | 1.   | 0.   | 1.875825  | 1.737620  | -0.573685 |
| 33.                                        | 1.   | 0.   | -0.308417 | 3.715885  | 3.950987  |
| 34.                                        | 1.   | 0.   | -1.917652 | 4.083810  | 2.062069  |
| 35.                                        | 1.   | 0.   | -3.451808 | 2.007874  | 0.130199  |
| 36.                                        | 1.   | 0.   | -0.247487 | 3.318116  | -1.341603 |
| 37.                                        | 1.   | 0.   | -1.781780 | 3.835631  | -0.641712 |
| 38.                                        | 1.   | 0.   | -3.144981 | -1.587458 | -1.889962 |
| 39.                                        | 1.   | 0.   | -0.087304 | -0.595811 | -3.704907 |
| 40.                                        | 1.   | 0.   | -1.277916 | -1.892881 | -3.491922 |
| 41.                                        | 1.   | 0.   | 1.974639  | -0.860860 | 0.482347  |
| 42.                                        | 1.   | 0.   | 0.624413  | -2.527996 | 2.273206  |
| 43.                                        | 1.   | 0.   | -1.044134 | -4.374397 | 2.364453  |
| 44.                                        | 1.   | 0.   | -2.081374 | -5.248078 | 0.295214  |
| 45.                                        | 1.   | 0.   | -1.483543 | -4.270313 | -1.919452 |
| 46.                                        | 1.   | 0.   | 1.658231  | -2.337383 | -3.708111 |
| <b>1b</b> Standard Orientation (Ångstroms) |      |      |           |           |           |
| I                                          | Atom | Type | X         | Y         | Z         |
| 1.                                         | 6.   | 0.   | 2.181178  | 2.585657  | -2.023817 |
| 2.                                         | 6.   | 0.   | 2.260933  | 3.848389  | -2.648766 |
| 3.                                         | 6.   | 0.   | 1.600624  | 4.954006  | -2.124100 |
| 4.                                         | 6.   | 0.   | 0.855527  | 4.766453  | -0.953815 |
| 5.                                         | 6.   | 0.   | 0.759768  | 3.501368  | -0.304357 |
| 6.                                         | 6.   | 0.   | 1.439762  | 2.401146  | -0.862342 |
| 7.                                         | 7.   | 0.   | 0.112878  | 5.664052  | -0.217200 |
| 8.                                         | 6.   | 0.   | -0.439170 | 5.014883  | 0.866672  |
| 9.                                         | 6.   | 0.   | -0.073400 | 3.689714  | 0.860523  |
| 10.                                        | 6.   | 0.   | -2.819291 | 1.816112  | 1.292520  |
| 11.                                        | 6.   | 0.   | -1.430887 | 1.617808  | 1.322951  |
| 12.                                        | 6.   | 0.   | -0.479432 | 2.656208  | 1.881514  |
| 13.                                        | 7.   | 0.   | -3.660427 | 0.908288  | 0.791210  |
| 14.                                        | 6.   | 0.   | -3.116510 | -0.210226 | 0.295721  |
| 15.                                        | 6.   | 0.   | -1.735627 | -0.428257 | 0.294248  |
| 16.                                        | 7.   | 0.   | -0.908377 | 0.493864  | 0.818297  |
| 17.                                        | 6.   | 0.   | -0.645410 | -2.889403 | 1.875193  |
| 18.                                        | 6.   | 0.   | -0.016398 | -2.336359 | 0.551918  |
| 19.                                        | 6.   | 0.   | -1.110392 | -1.660379 | -0.317948 |
| 20.                                        | 7.   | 0.   | -0.528796 | -4.256819 | 1.842324  |
| 21.                                        | 6.   | 0.   | 0.166388  | -4.702798 | 0.705034  |
| 22.                                        | 6.   | 0.   | 0.511270  | -3.601466 | -0.092191 |
| 23.                                        | 8.   | 0.   | -1.144669 | -2.228343 | 2.772689  |
| 24.                                        | 6.   | 0.   | 0.510067  | -6.001864 | 0.351863  |

|                                            |      |      |           |           |           |
|--------------------------------------------|------|------|-----------|-----------|-----------|
| 25.                                        | 6.   | 0.   | 1.229639  | -6.178587 | -0.838241 |
| 26.                                        | 6.   | 0.   | 1.589365  | -5.091109 | -1.638054 |
| 27.                                        | 6.   | 0.   | 1.227808  | -3.787933 | -1.264322 |
| 28.                                        | 8.   | 0.   | 1.043811  | -1.439921 | 0.838600  |
| 29.                                        | 1.   | 0.   | 2.708758  | 1.743512  | -2.462342 |
| 30.                                        | 1.   | 0.   | 2.847766  | 3.959136  | -3.555890 |
| 31.                                        | 1.   | 0.   | 1.660090  | 5.927110  | -2.602430 |
| 32.                                        | 1.   | 0.   | 1.377574  | 1.421171  | -0.399814 |
| 33.                                        | 1.   | 0.   | 0.001039  | 6.644351  | -0.424305 |
| 34.                                        | 1.   | 0.   | -1.054906 | 5.553521  | 1.573291  |
| 35.                                        | 1.   | 0.   | -3.252419 | 2.730523  | 1.690866  |
| 36.                                        | 1.   | 0.   | -0.954462 | 3.158788  | 2.729938  |
| 37.                                        | 1.   | 0.   | 0.401306  | 2.129022  | 2.265289  |
| 38.                                        | 1.   | 0.   | -3.795220 | -0.956115 | -0.110306 |
| 39.                                        | 1.   | 0.   | -0.627597 | -1.376226 | -1.261439 |
| 40.                                        | 1.   | 0.   | -1.889174 | -2.387609 | -0.564984 |
| 41.                                        | 1.   | 0.   | -0.832516 | -4.849899 | 2.602763  |
| 42.                                        | 1.   | 0.   | 0.237995  | -6.847867 | 0.974427  |
| 43.                                        | 1.   | 0.   | 1.513318  | -7.182938 | -1.138024 |
| 44.                                        | 1.   | 0.   | 2.151941  | -5.254623 | -2.551584 |
| 45.                                        | 1.   | 0.   | 1.510124  | -2.938880 | -1.879953 |
| 46.                                        | 1.   | 0.   | 0.616150  | -0.578460 | 1.039376  |
| <b>1c</b> Standard Orientation (Ångstroms) |      |      |           |           |           |
| I                                          | Atom | Type | X         | Y         | Z         |
| 1.                                         | 6.   | 0.   | -0.143689 | 1.765493  | 3.002700  |
| 2.                                         | 6.   | 0.   | 1.196029  | 2.087425  | 3.311638  |
| 3.                                         | 6.   | 0.   | 2.033904  | 2.672338  | 2.365935  |
| 4.                                         | 6.   | 0.   | 1.499704  | 2.925475  | 1.096031  |
| 5.                                         | 6.   | 0.   | 0.154876  | 2.595350  | 0.757421  |
| 6.                                         | 6.   | 0.   | -0.667727 | 2.011406  | 1.738050  |
| 7.                                         | 7.   | 0.   | 2.078246  | 3.480314  | -0.023719 |
| 8.                                         | 6.   | 0.   | 1.155459  | 3.495496  | -1.050326 |
| 9.                                         | 6.   | 0.   | -0.036579 | 2.963396  | -0.624288 |
| 10.                                        | 6.   | 0.   | -2.937171 | 0.826677  | -1.586303 |
| 11.                                        | 6.   | 0.   | -1.618947 | 1.292501  | -1.682970 |
| 12.                                        | 6.   | 0.   | -1.271294 | 2.755064  | -1.455278 |
| 13.                                        | 7.   | 0.   | -3.262858 | -0.452394 | -1.803602 |
| 14.                                        | 6.   | 0.   | -2.258473 | -1.280311 | -2.108595 |
| 15.                                        | 6.   | 0.   | -0.931664 | -0.839196 | -2.204670 |
| 16.                                        | 7.   | 0.   | -0.625892 | 0.450255  | -1.999732 |
| 17.                                        | 6.   | 0.   | 1.797503  | -0.947190 | -0.685228 |
| 18.                                        | 6.   | 0.   | 1.083363  | -2.184374 | -1.304580 |
| 19.                                        | 6.   | 0.   | 0.205173  | -1.780217 | -2.520502 |
| 20.                                        | 7.   | 0.   | 1.348703  | -0.811131 | 0.599800  |

|                                            |      |      |           |           |           |
|--------------------------------------------|------|------|-----------|-----------|-----------|
| 21.                                        | 6.   | 0.   | 0.481049  | -1.857273 | 0.963244  |
| 22.                                        | 6.   | 0.   | 0.305772  | -2.725470 | -0.126100 |
| 23.                                        | 8.   | 0.   | 2.646565  | -0.276659 | -1.253640 |
| 24.                                        | 6.   | 0.   | -0.135884 | -2.080840 | 2.187904  |
| 25.                                        | 6.   | 0.   | -0.939178 | -3.223078 | 2.306878  |
| 26.                                        | 6.   | 0.   | -1.115365 | -4.102897 | 1.236033  |
| 27.                                        | 6.   | 0.   | -0.491745 | -3.852939 | 0.004470  |
| 28.                                        | 8.   | 0.   | 2.076994  | -3.113616 | -1.726894 |
| 29.                                        | 1.   | 0.   | -0.771693 | 1.317676  | 3.767201  |
| 30.                                        | 1.   | 0.   | 1.579171  | 1.879488  | 4.306131  |
| 31.                                        | 1.   | 0.   | 3.062817  | 2.924719  | 2.603819  |
| 32.                                        | 1.   | 0.   | -1.696906 | 1.749314  | 1.510000  |
| 33.                                        | 1.   | 0.   | 3.025676  | 3.818160  | -0.090221 |
| 34.                                        | 1.   | 0.   | 1.424696  | 3.885070  | -2.022012 |
| 35.                                        | 1.   | 0.   | -3.746006 | 1.506695  | -1.327692 |
| 36.                                        | 1.   | 0.   | -1.126233 | 3.228780  | -2.434429 |
| 37.                                        | 1.   | 0.   | -2.139051 | 3.250464  | -1.003089 |
| 38.                                        | 1.   | 0.   | -2.509878 | -2.323867 | -2.282179 |
| 39.                                        | 1.   | 0.   | 0.867991  | -1.304639 | -3.251933 |
| 40.                                        | 1.   | 0.   | -0.175619 | -2.707143 | -2.958917 |
| 41.                                        | 1.   | 0.   | 1.655875  | -0.072956 | 1.221207  |
| 42.                                        | 1.   | 0.   | 0.000581  | -1.398217 | 3.019532  |
| 43.                                        | 1.   | 0.   | -1.431331 | -3.424662 | 3.253537  |
| 44.                                        | 1.   | 0.   | -1.738714 | -4.983000 | 1.356378  |
| 45.                                        | 1.   | 0.   | -0.627653 | -4.534647 | -0.829861 |
| 46.                                        | 1.   | 0.   | 2.720401  | -2.605839 | -2.248148 |
| <b>1d</b> Standard Orientation (Ångstroms) |      |      |           |           |           |
| I                                          | Atom | Type | X         | Y         | Z         |
| 1.                                         | 6.   | 0.   | 0.557755  | 5.656257  | 3.218827  |
| 2.                                         | 6.   | 0.   | 1.128507  | 4.972665  | 4.313849  |
| 3.                                         | 6.   | 0.   | 1.147862  | 3.582570  | 4.366154  |
| 4.                                         | 6.   | 0.   | 0.580531  | 2.886886  | 3.291870  |
| 5.                                         | 6.   | 0.   | -0.002006 | 3.555253  | 2.176813  |
| 6.                                         | 6.   | 0.   | -0.005281 | 4.962171  | 2.153787  |
| 7.                                         | 7.   | 0.   | 0.454687  | 1.534314  | 3.065509  |
| 8.                                         | 6.   | 0.   | -0.183676 | 1.326149  | 1.858231  |
| 9.                                         | 6.   | 0.   | -0.483111 | 2.536694  | 1.276376  |
| 10.                                        | 6.   | 0.   | -3.258051 | 1.409700  | -0.485489 |
| 11.                                        | 6.   | 0.   | -1.870622 | 1.577640  | -0.595379 |
| 12.                                        | 6.   | 0.   | -1.160861 | 2.791058  | -0.050205 |
| 13.                                        | 7.   | 0.   | -3.884202 | 0.314557  | -0.925958 |
| 14.                                        | 6.   | 0.   | -3.120538 | -0.634573 | -1.478014 |
| 15.                                        | 6.   | 0.   | -1.735720 | -0.489859 | -1.613057 |
| 16.                                        | 7.   | 0.   | -1.127014 | 0.627001  | -1.178284 |

|     |    |    |           |           |           |
|-----|----|----|-----------|-----------|-----------|
| 17. | 6. | 0. | -0.059781 | -2.565077 | -0.044223 |
| 18. | 6. | 0. | 0.382952  | -1.933214 | -1.407379 |
| 19. | 6. | 0. | -0.867329 | -1.548999 | -2.248610 |
| 20. | 7. | 0. | 0.323828  | -3.880724 | -0.060126 |
| 21. | 6. | 0. | 1.058602  | -4.205463 | -1.214686 |
| 22. | 6. | 0. | 1.145534  | -3.077534 | -2.043169 |
| 23. | 8. | 0. | -0.640514 | -1.997218 | 0.870887  |
| 24. | 6. | 0. | 1.650209  | -5.415515 | -1.554440 |
| 25. | 6. | 0. | 2.354694  | -5.471170 | -2.765271 |
| 26. | 6. | 0. | 2.459361  | -4.353549 | -3.597017 |
| 27. | 6. | 0. | 1.849229  | -3.142763 | -3.235993 |
| 28. | 8. | 0. | 1.226038  | -0.816442 | -1.196444 |
| 29. | 1. | 0. | 0.560529  | 6.742377  | 3.211259  |
| 30. | 1. | 0. | 1.561015  | 5.542170  | 5.131250  |
| 31. | 1. | 0. | 1.587012  | 3.055811  | 5.208155  |
| 32. | 1. | 0. | -0.440559 | 5.500332  | 1.316071  |
| 33. | 1. | 0. | 0.765579  | 0.803517  | 3.686279  |
| 34. | 1. | 0. | -0.366342 | 0.319546  | 1.506320  |
| 35. | 1. | 0. | -3.870751 | 2.184139  | -0.030401 |
| 36. | 1. | 0. | -0.426675 | 3.125520  | -0.795148 |
| 37. | 1. | 0. | -1.883476 | 3.607697  | 0.060731  |
| 38. | 1. | 0. | -3.619272 | -1.535754 | -1.826146 |
| 39. | 1. | 0. | -0.492515 | -1.178399 | -3.210475 |
| 40. | 1. | 0. | -1.462449 | -2.442267 | -2.457167 |
| 41. | 1. | 0. | 0.182725  | -4.499903 | 0.726682  |
| 42. | 1. | 0. | 1.576769  | -6.283089 | -0.907014 |
| 43. | 1. | 0. | 2.829563  | -6.403288 | -3.056167 |
| 44. | 1. | 0. | 3.016278  | -4.421652 | -4.525977 |
| 45. | 1. | 0. | 1.932608  | -2.269739 | -3.876610 |
| 46. | 1. | 0. | 0.630875  | -0.046832 | -1.060203 |



Figure S18.  $^1\text{H}$  NMR spectrum of indolepyrazine B (2)

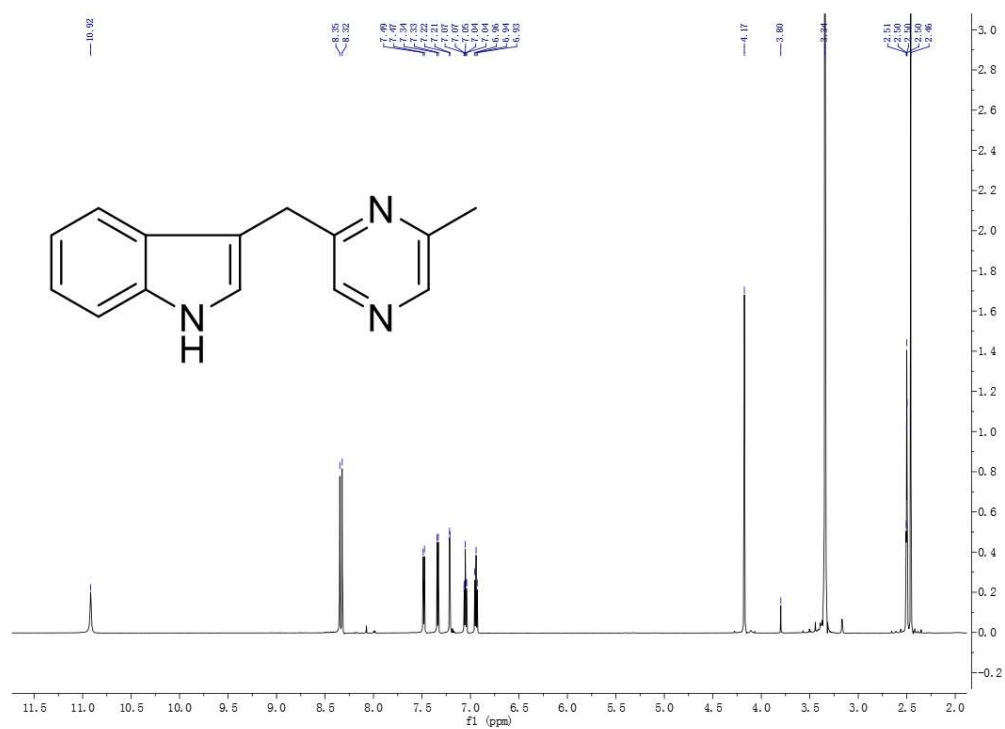

Figure S19.  $^1\text{H}$  NMR spectrum of indolepyrazine B (2)

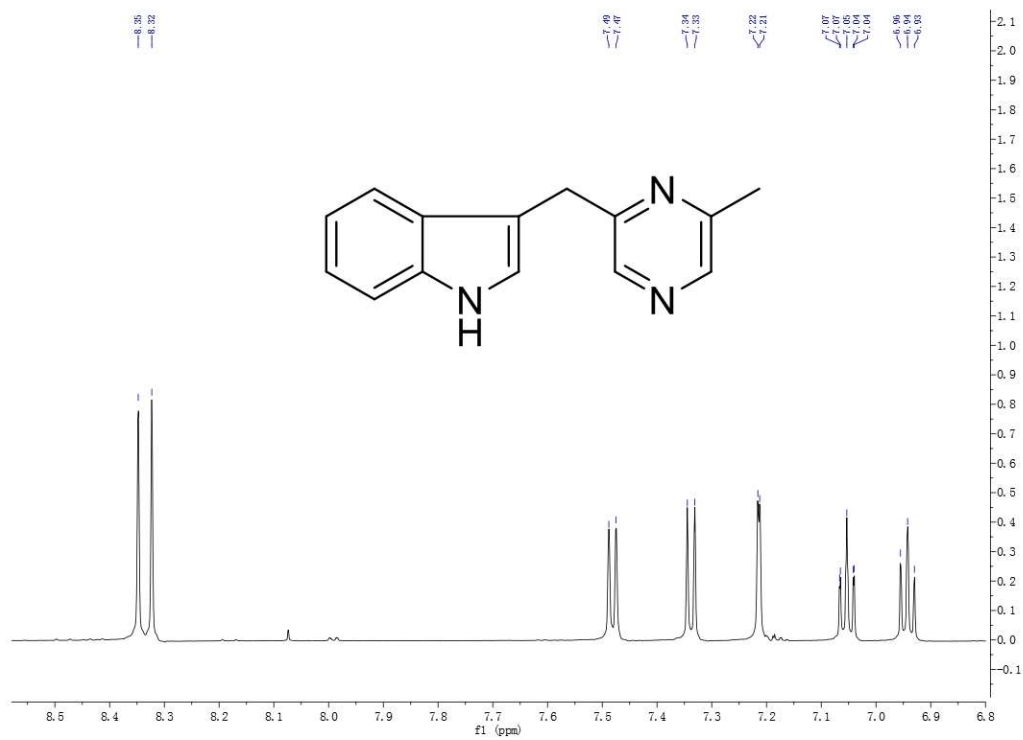

Figure S20. <sup>1</sup>H NMR spectrum of indolepyrazine B (2)

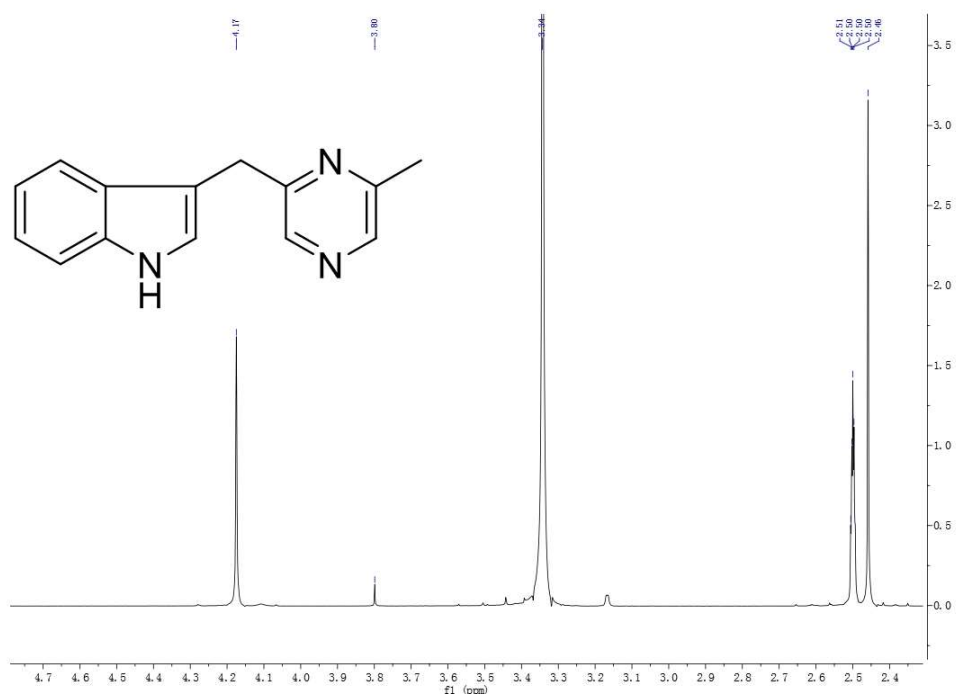

Figure S21. <sup>13</sup>C NMR spectrum of indolepyrazine B (2)

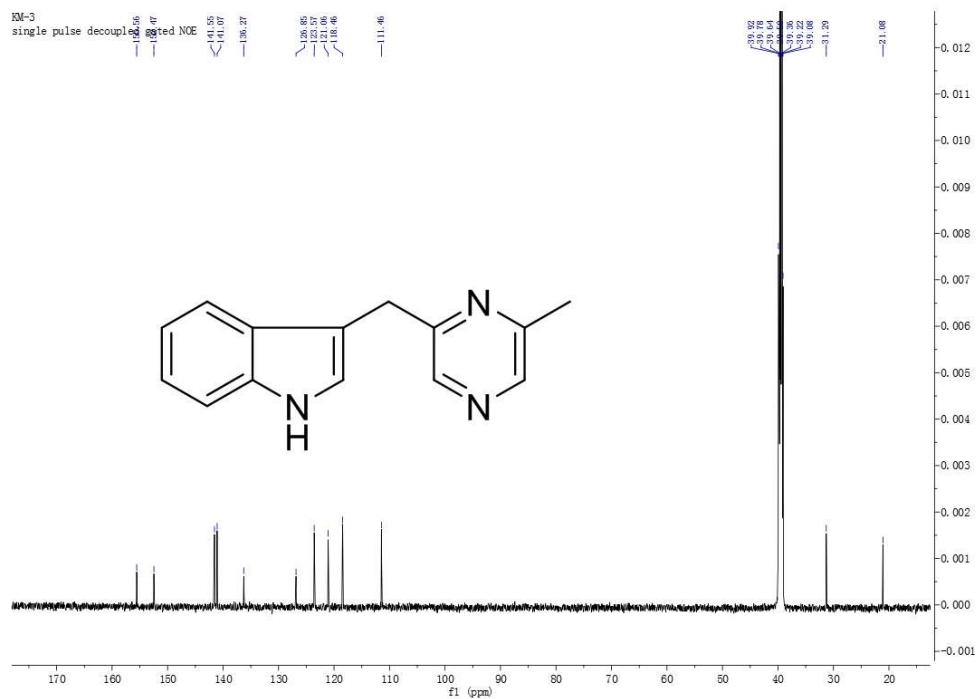

Figure S22.  $^{13}\text{C}$  NMR spectrum of indolepyrazine B (**2**)

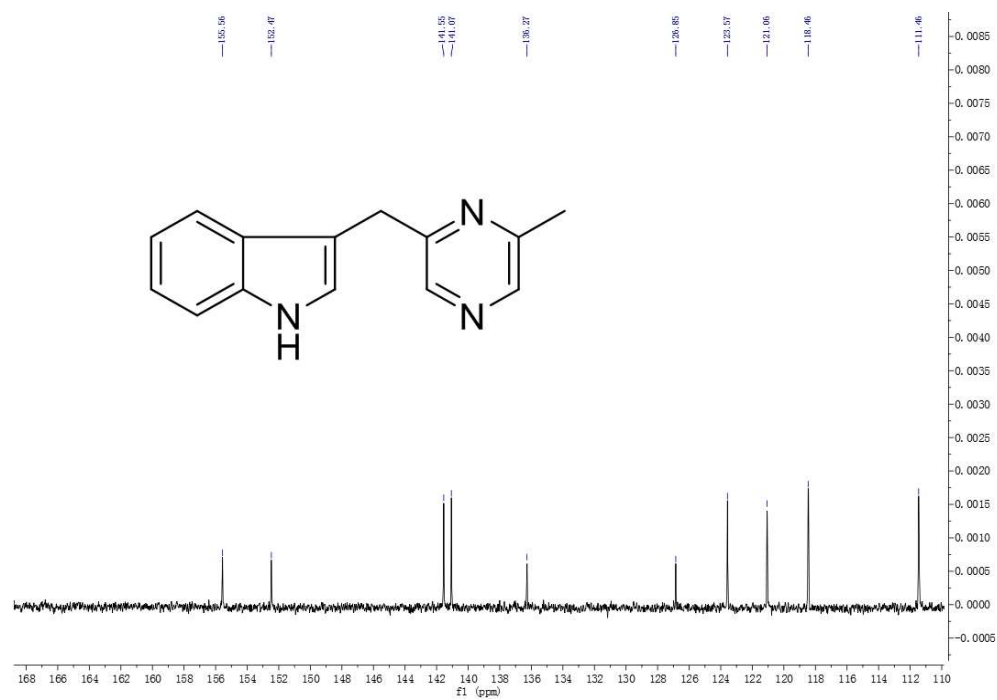

Figure S23.  $^1\text{H}$ - $^1\text{H}$  COSY spectrum of indolepyrazine B (**2**)

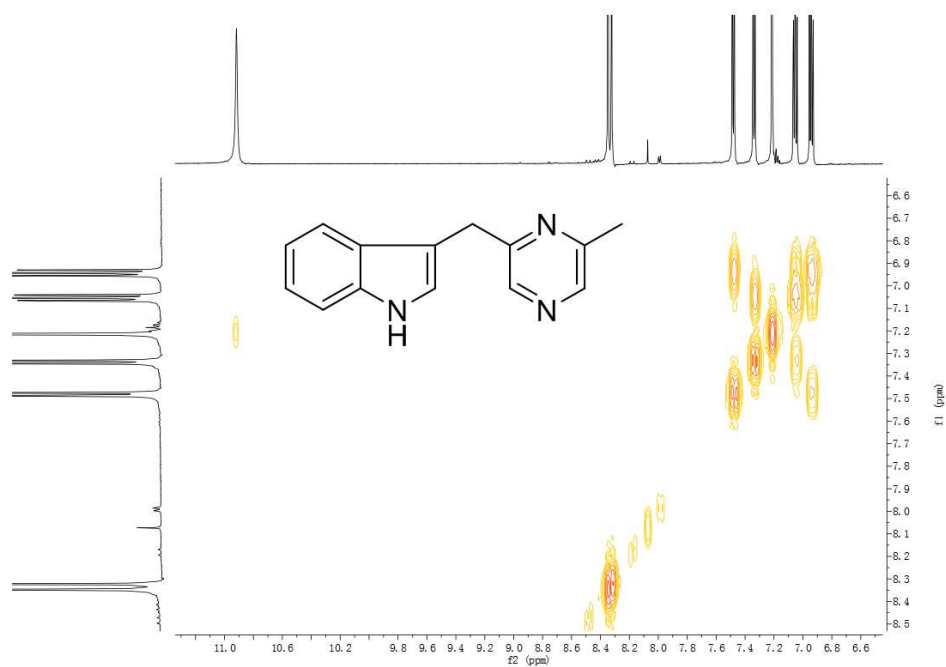

Figure S24. HSQC spectrum of indolepyrazine B (2)

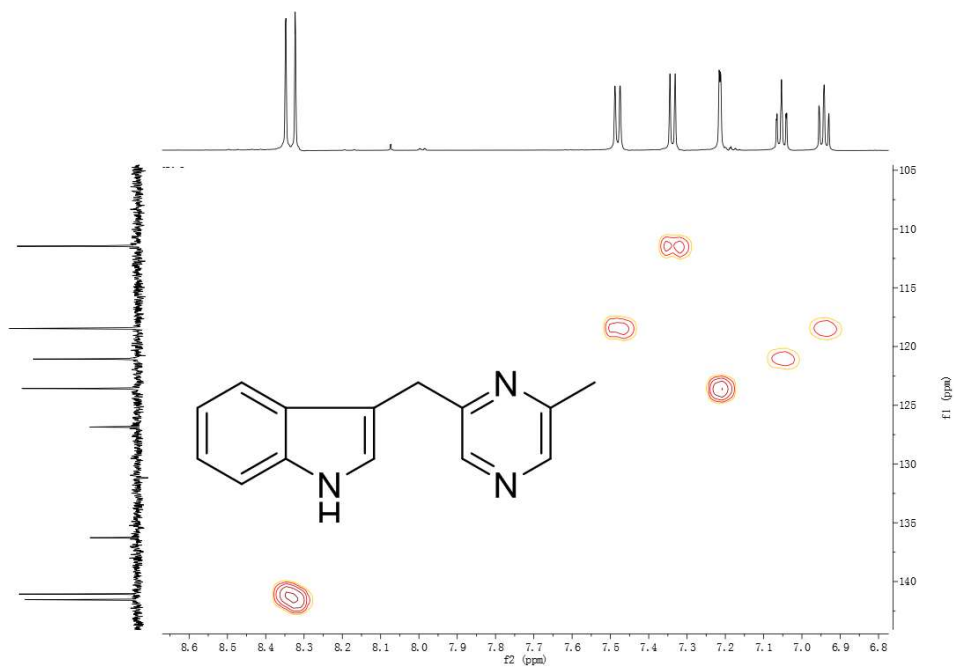

Figure S25. HSQC spectrum of indolepyrazine B (2)

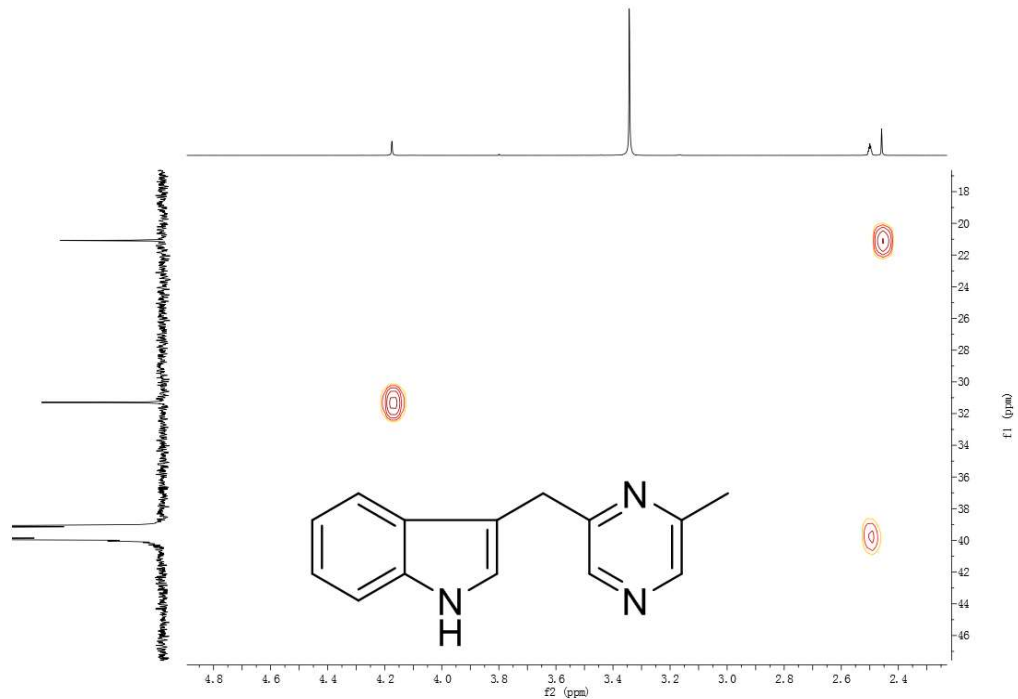

Figure S<sub>26</sub>. HMBC spectrum of indolepyrazine B (2)

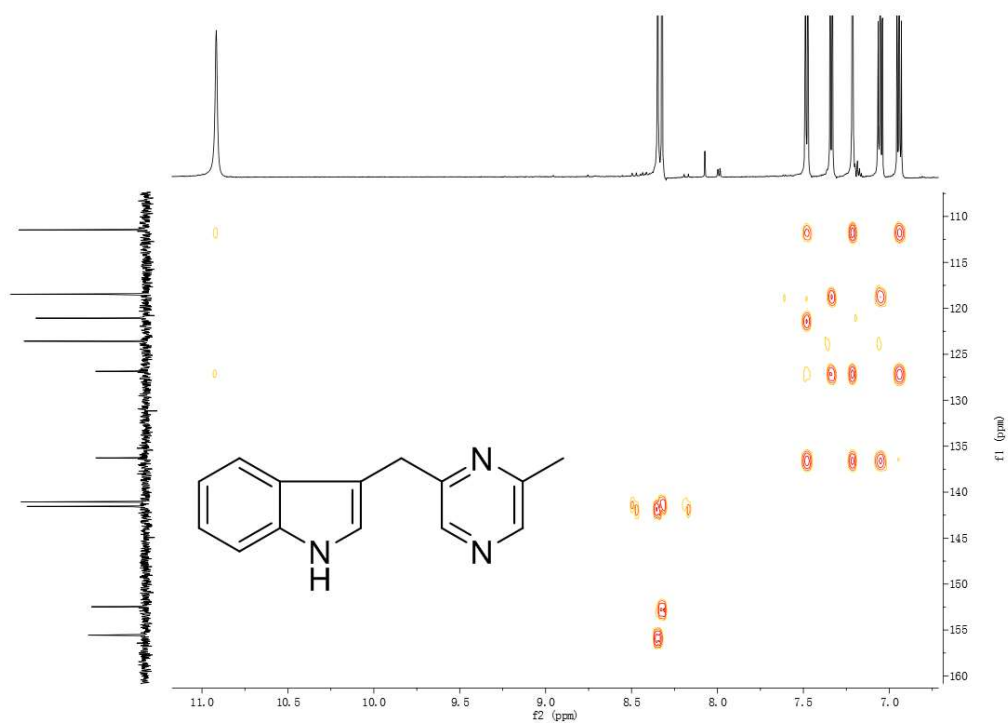

Figure S<sub>27</sub>. HMBC spectrum of indolepyrazine B (2)

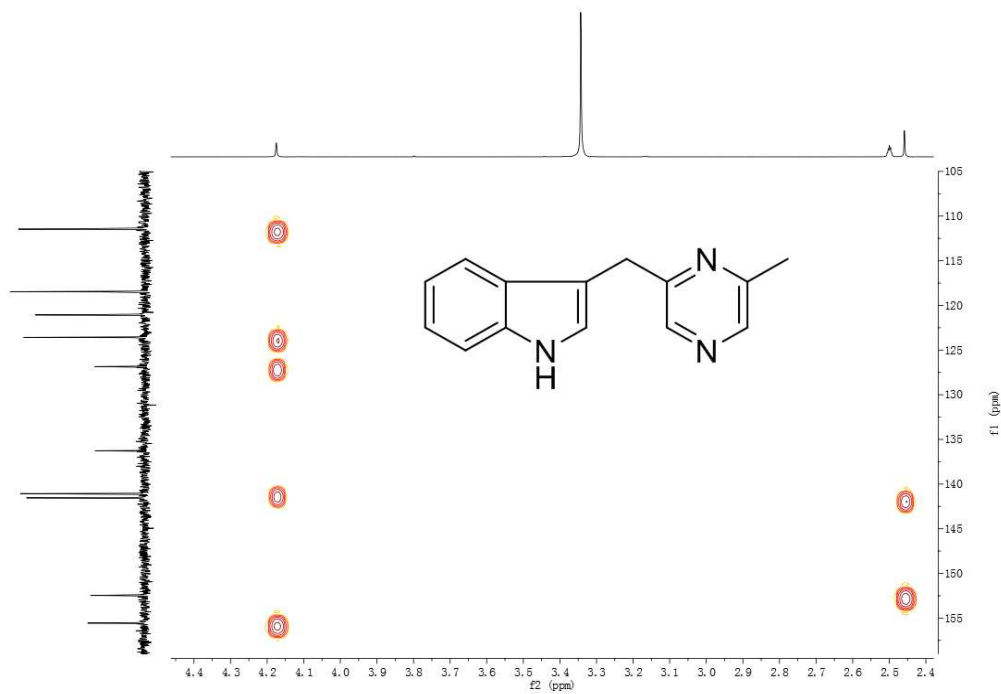

Figure S<sub>28</sub>. HRESIMS spectrum of indolepyrazine B (**2**)

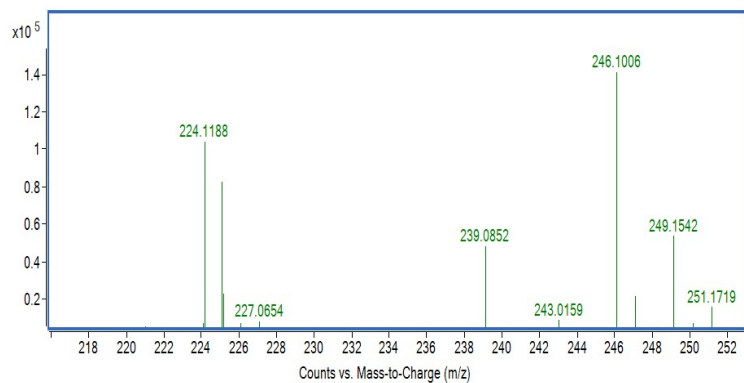

Figure S<sub>29</sub>. UV spectrum of indolepyrazine B (**2**)

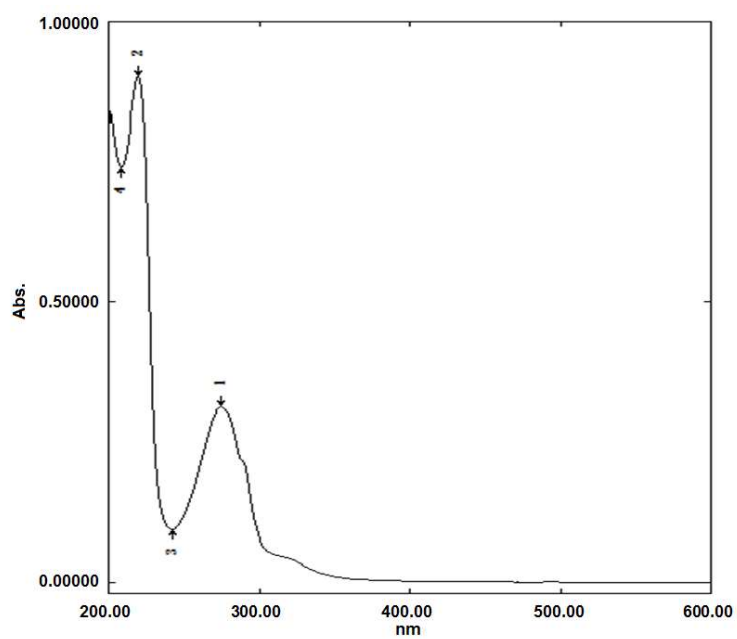

Supplement: marinedrugs-17-00089-s001.pdf [file marinedrugs-17-00089-s001.pdf]
